# Supplementary material for: SDMA attenuates renal tubulointerstitial fibrosis through inhibition of STAT4
Source: Springer Nature journal article supplement (doi:10.1186/s12967-023-04181-9), 2023-05-16
Supplement: MOESM2 [file 25368062]

**Table S1: List of primers used for quantitative PCR**

| <b>Primer Name</b>                   | <b>Forward</b>                    | <b>Reverse</b>                   |
|--------------------------------------|-----------------------------------|----------------------------------|
| <b>mouse Stat4</b>                   | CTCAGTAAGATGACGCAGATA             | GCCAGTAGGGTAAAGCAGTT             |
| <b>mouse Klf15</b>                   | CACCTGTCCCAGTCCAAAGC              | AGGCTGGCTTCAGTTCTTCC             |
| <b>mouse Ppar<math>\alpha</math></b> | CGAAGACAAAGAGGCAGAGG              | AGGAGGACAGCATCGTGAAG             |
| <b>mouse Rel</b>                     | GAGGGGAATGCGGTTTAGATACAA          | TGGGAGGCACAGCAGTTGTGAAGT         |
| <b>mouse Sox6</b>                    | GCCCTTCCTCACCAGAAGAG              | ATAAGGGCATGATCAAGGGG             |
| <b>mouse Hnf4a</b>                   | CCCCCTCCTCCAATGGTACT              | ACGCCTGATGCATTGAAGGT             |
| <b>mouse Egr2</b>                    | ACTCTTCAGCCTTCCTTCC               | CGTACAGGTCTTTGCGGATG             |
| <b>mouse Klf1</b>                    | CCTCCATCAGTACACTCACC              | CCTCCGATTCAGACTCACG              |
| <b>mouse Klf6</b>                    | GAGAATTCAGCATGAACTTTCCACC<br>TGCG | ACGCTCGAGCCTACAGGATTCGTC<br>CCTC |
| <b>mouse Myb</b>                     | ATTGTGGACCAGACCAGACC              | CTTCTTTCACGGAGTGGTCCG            |
| <b>mouse Gapdh</b>                   | AGGTCGGTGTGAACGGATTTG             | TGTAGACCATGTAGTTGAGGTCA          |
